# Supplementary material
Source: publisher figshare collection journal article supplement (https://tandf.figshare.com/ndownloader/files/13574342)
Supplement: Supplementary file 1 [file 13574342]

## Sheet: Figure A1
				Appendix A
				Figure A1. Measurement of variables in time.
										Modelled growth period G_TAs_t_t+8
				t-3	t-2	t-1	t	t+1	t+2	t+3	t+4	t+5	t+6	t+7	t+8
					Estimation period for network centrality variables			Point of measurement of the remaining explanatory variables
				Source: Authors' illustration derived from Evans (1987).

## Sheet: Table B1
			Appendix B
			Table B1. Definitions of variables and data sources.
			Variable name	Definition		Data source
			G_TA_t_t+j	Average annual growth rate in total assets for the stated time period (from t to t+j)		Authors' calculations based on FAME data
			Age	Firm age [years]		FAME
			Total assets	Total assets [th GBP]		FAME
			Survival probability	Probit estimate of survival probability conditional on age, total assets and their interaction term		Estimates based on FAME data
			FABS employment	Full time employment in financial services activities except insurance and pension funding (SIC 2007 code 64) plus employment in activities auxiliary to financial services and insurance activities (SIC 2007 code 66) at NUTS 2 regional level		BRES - ONS
			Other employment	Full time employment in all other industries at NUTS 2 regional level		BRES - ONS
			Degree centrality	The number of adjacent edges of each node. This is the number of firms that firm a is connected to through its underwriting syndication ties		Author's calculations based on Dealogic data
			Betweenness centrality	Betweenness centrality of a node is defined by the number of shortest geodesic paths connecting other nodes that pass through this node		Author's calculations based on Dealogic data
			Network constraint	Measure of brokerage in networks based on the propensity of a node to span structural holes (Burt, 2004). It varies between 0 and 1 and it is higher for nodes with fewer or more redundant ties (higher density of ties among the nodes that it is connected to)		Author's calculations based on Dealogic data
			Degree centrality (intra-cluster ties)	Only ties to other firms within the same metropolitan area are counted		Author's calculations based on Dealogic data
			Degree centrality (inter-cluster ties)	Only ties to other firms outside its own metropolitan area are counted		Author's calculations based on Dealogic data
			Degree centrality (inter-cluster ties - weighted by alter's FC size)	Sum of inter-cluster ties weighted by alter's financial centre size. Each financial centre is only counted once and the links are weighted by the aggregate fees earned from the four products (ECM, DCM, LOANS, M&As) considered here		Author's calculations based on Dealogic data
			Degree centrality (co-management ties)	Only ties from lead-managers to co-managers are counted		Author's calculations based on Dealogic data
			Degree centrality (lead-management ties)	Only ties from lead-managers to co-managers are counted		Author's calculations based on Dealogic data
			Source: FAME, Dealogic, ONS-BRES

## Sheet: Table B2
		Table B2. Descriptive statistics.
		Variable name	Time period	Observations	Missing	Min	Median	Mean	Max	SD
		G_TA_2007_2015	2007 - 2015	1246	1584	-1.57613	-0.0165367	-0.0149035	1.85453	0.237429
		G_TA_2007_2013	2007 - 2013	1486	1344	-2.10151	-0.00760477	-0.0076875	1.98403	0.278116
		G_TA_2008_2014	2008 - 2014	1438	1225	-2.10151	0	-0.0044369	2.46131	0.284926
		G_TA_2009_2015	2009 - 2015	1351	1134	-2.10109	-0.011971	-0.010805	2.47271	0.277373
		Age [years]	2007 - 2015	2829	0	0	1	7.01202	142	13.8635
			2007 - 2013	2829	0	0	1	7.01202	142	13.8635
			2008 - 2014	2663	0	0	2	8.52948	143	14.26
			2009 - 2015	2483	0	0	5	10.1325	144	14.6987
		Total assets [th GBP]	2007 - 2015	2829	0	1	215	6.02739e+06	1689308000	6.88675e+07
			2007 - 2013	2829	0	1	215	6.02739e+06	1689308000	6.88675e+07			`
			2008 - 2014	2663	0	1	299	6.18641e+06	1612822000	6.87259e+07
			2009 - 2015	2483	0	1	450	7.14357e+06	1656437000	7.86851e+07
		Survival probability	2007 - 2015	2829	0	0.000166166	0.170168	0.430599	1	0.426022
			2007 - 2013	2829	0	0.0196911	0.435305	0.526154	1	0.378201
			2008 - 2014	2663	0	5.90559e-06	0.502332	0.536346	1	0.40831
			2009 - 2015	2483	0	2.05456e-10	0.588316	0.533355	1	0.407922
		FABS employment [full time employees]	2007 - 2015	2829	0	1748	31321	132648	251399	114538
			2007 - 2013	2829	0	1748	31321	132648	251399	114538
			2008 - 2014	2663	0	1689	256332	140841	256332	117121
			2009 - 2015	2483	0	1471	240199	137519	240199	108732
		Other employment [full time employees]	2007 - 2015	2829	0	118292	1131282	1.11858e+06	1607369	509767
			2007 - 2013	2829	0	118292	1131282	1.11858e+06	1607369	509767
			2008 - 2014	2663	0	114080	1656539	1.16772e+06	1656539	529661
			2009 - 2015	2483	0	113814	1696362	1.20263e+06	1696362	551185
		Degree centrality	2007 - 2015	2829	0	0	0	37.5987	3976	245.144
			2007 - 2013	2829	0	0	0	31.7968	3976	225.087
			2008 - 2014	2663	0	0	0	30.2211	3690	206.529
			2009 - 2015	2483	0	0	0	27.7913	3490	188.272
		Betweenness centrality	2007 - 2015	2829	0	0	0	3602.02	836632	38125.9
			2007 - 2013	2829	0	0	0	3015.44	836632	34934.2
			2008 - 2014	2663	0	0	0	3268.3	771456	34001.6
			2009 - 2015	2483	0	0	0	3439.48	1.07684e+06	40040.8
		Network constraint	2007 - 2015	2829	0	0.0030155	1	0.891631	1	0.290261
			2007 - 2013	2829	0	0.0030155	1	0.907125	1	0.270989
			2008 - 2014	2663	0	0.00310503	1	0.898938	1	0.281914
			2009 - 2015	2483	0	0.00318832	1	0.893217	1	0.288216
		Degree centrality (intra-cluster ties)	2007 - 2015	2829	0	0	0	1.30899	89	6.9465
			2007 - 2013	2829	0	0	0	1.11104	89	6.4112
			2008 - 2014	2663	0	0	0	1.14534	90	6.44513
			2009 - 2015	2483	0	0	0	8.70244	1008	58.6971
		Degree centrality (inter-cluster ties)	2007 - 2015	2829	0	0	0	12.992	1060	74.326
			2007 - 2013	2829	0	0	0	11.0094	1060	68.2995
			2008 - 2014	2663	0	0	0	10.8387	1017	65.2748
			2009 - 2015	2483	0	0	0	10.2065	1008	60.9286
		Degree centrality (inter-cluster ties - weighted by alter's FC size) [mil 2012 USD]	2007 - 2015	2829	0	0	0	12899	135357	32574.8
			2007 - 2013	2829	0	0	0	11168.7	135357	30554.2
			2008 - 2014	2663	0	0	0	8319.46	93784.8	21352.1
			2009 - 2015	2483	0	0	0	7772.04	84446.4	19196.2
		Degree centrality (co-management ties)	2007 - 2015	2829	0	0	0	2.05538	306	14.6288
			2007 - 2013	2829	0	0	0	1.73217	306	13.4204
			2008 - 2014	2663	0	0	0	1.39152	241	10.8423
			2009 - 2015	2483	0	0	0	1.41303	201	10.2847
		Degree centrality (lead-management ties)	2007 - 2015	2829	0	0	0	3.6886	679	36.6011
			2007 - 2013	2829	0	0	0	3.0895	679	33.5395
			2008 - 2014	2663	0	0	0	2.16203	471	22.5724
			2009 - 2015	2483	0	0	0	1.84456	464	20.6693
		Source: Authors' calculations based on Dealogic, FAME, ONS-BRES data

## Sheet: Table C1
		Appendix C
		Table C1. Results by sample period.
		Main equation	[ 1 ]			[ 2 ]			[ 3 ]			[ 4 ]
			β̂	***	t-stat	β̂	***	t-stat	β̂	***	t-stat	β̂	***	t-stat
		Direct effects
		Age	0.481	***	3.83	0.295	***	3.21	0.162	*	1.91	0.261	***	3.02
		Age ^ 2	-0.0635	***	-3.21	-0.039	***	-2.69	-0.0184		-1.56	-0.0309	**	-2.27
		Total assets	-0.047	***	-5.71	-0.0515	***	-6.73	-0.05	***	-6.17	-0.0428	***	-6.69
		Total assets ^ 2	0.001	***	2.65	0.001	***	2.65	0.00126	***	3.36	0.00096	***	2.93
		Network constraint	-0.186	***	-4.33	-0.2	***	-4.63	-0.189	***	-4.3	-0.187	***	-4.99
		Survival probability	-0.167	*	-1.82	-0.123		-1.4	-0.143		-1.06	-0.186	*	-1.95
		FABS employment	0.054	**	2.34	0.0362	*	1.69	0.0444	**	2.06	0.0386	*	1.95
		Other employment	-0.0487		-0.89	-0.0426		-0.8	-0.039		-0.79	-0.0472		-0.99
		Age * Total assets	-6.06e-05		-0.02	0.000825		0.32	-6.66e-05		-0.03	-0.000982		-0.46
		Indirect effects
		Age	0.0508		1.55	-0.00352		-0.14	0.00307		0.13	-0.00431		-0.16
		Age ^ 2	-0.00805		-1.58	0.00256		0.66	0.00107		0.34	0.000653		0.16
		Total assets	0.00181		0.85	0.0026		1.54	0.00171		1.09	0.000392		0.27
		Total assets ^ 2	-9.67e-05		-1.13	-4.64e-05		-0.53	4.75e-05		0.5	-1.87e-05		-0.22
		Network constraint	0.0226	*	1.9	0.0278	**	2.18	0.0323	**	2.56	0.0237	**	2.09
		Survival probability	-0.0427	**	-2.05	-0.0176		-0.81	-0.0153		-0.42	-0.0121		-0.47
		FABS employment	-0.0017		-1.15	0.00173		1.29	0.000571		0.52	0.000162		0.13
		Other employment	0.00249		0.8	-0.00612	**	-2.08	-0.00382		-1.52	-0.00224		-0.81
		Age * Total assets	0.000327		0.4	-0.000483		-0.66	-0.000624		-0.87	0.00031		0.5
		Adjusted R-squared	0.157			0.176			0.148			0.189
		Sample period	2009 - 2015			2008 - 2014			2007 - 2013			2007 - 2015
		Survivors	1351			1438			1486			1246
		Full sample	2485			2663			2830			2830
		Survival equation
		Age	3.61228	***	19.382	2.93407	***	14.276	1.57491	***	13.716	2.67446	***	19.69
		Total assets	0.30959	***	8.733	0.23558	***	6.382	0.14193	***	7.857	0.19468	***	9.333
		Age * Total assets	-0.14836	***	-7.959	-0.09894	***	-3.6	-0.03187	*	-1.893	-0.10658	***	-7.733
		Notes: *** significant at 1% level, ** 5% level, * 10% level; The dependent variable for all main equations is an average annual logarithmic growth rate of total assets for the stated period. All variables apart from survival probability are transformed by taking a natural logaritm and 1 is added to the value of variables that include zeros, to avoid undefined values. All main equations are estim…
		Source: Authors' analysis.

## Sheet: Table C2
		Table C2. Sensitivity of results to the great circle distance.
		Main equation	[ 1 ]			[ 2 ]			[ 3 ]			[ 4 ]			[ 5 ]
			β̂	***	t-stat	β̂	***	t-stat	β̂	***	t-stat	β̂	***	t-stat	β̂	***	t-stat
		Direct effects
		Age	0.224	**	2.52	0.247	***	2.8	0.261	***	3.02	0.298	***	3.46	0.272	***	3.19
		Age ^ 2	-0.0258	*	-1.85	-0.0291	**	-2.09	-0.0309	**	-2.27	-0.0349	**	-2.57	-0.0338	**	-2.51
		Total assets	-0.043	***	-6.74	-0.0432	***	-6.64	-0.0428	***	-6.69	-0.0431	***	-6.65	-0.0408	***	-6.23
		Total assets ^ 2	0.000901	***	2.74	0.000941	***	2.84	0.00096	***	2.93	0.00122	***	3.69	0.000803	**	2.35
		Network constraint	-0.183	***	-4.83	-0.171	***	-4.55	-0.187	***	-4.99	-0.187	***	-4.97	-0.193	***	-5.17
		Survival probability	-0.128		-1.31	-0.146		-1.5	-0.186	*	-1.95	-0.207	**	-2.18	-0.183	*	-1.94
		FABS employment	0.0341	*	1.69	0.03		1.64	0.0386	*	1.95	0.0357	*	1.81	0.0441	**	2.41
		Other employment	-0.000527		-0.01	-0.00232		-0.05	-0.0472		-0.99	-0.0255		-0.54	-0.0661		-1.36
		Age * Total assets	-0.000575		-0.27	-0.000829		-0.39	-0.000982		-0.46	-0.00279		-1.28	-0.000472		-0.21
		Indirect effects
		Age	-0.055		-1.6	-0.0325		-1.05	-0.00431		-0.16	0.0359		1.4	-0.0116		-0.49
		Age ^ 2	0.0076		1.44	0.0044		0.91	0.000653		0.16	-0.00479		-1.24	0.000427		0.12
		Total assets	-0.000947		-0.63	-0.0023	*	-1.9	0.000392		0.27	-0.000627		-0.45	0.00151		0.96
		Total assets ^ 2	-4.01e-05		-0.5	7.57e-05		0.95	-1.87e-05		-0.22	0.000224	**	2.54	-0.000138		-1.41
		Network constraint	0.0274	**	2.27	0.0426	***	3.6	0.0237	**	2.09	0.0303	**	2.56	0.0216	*	1.9
		Survival probability	0.0619	*	1.83	0.0467		1.64	-0.0121		-0.47	-0.032		-1.32	0.014		0.6
		FABS employment	0.00116		0.76	0.00168		1.25	0.000162		0.13	0.00154		1.41	-0.00039		-0.35
		Other employment	-0.00216		-0.61	-0.00276		-0.9	-0.00224		-0.81	-0.003		-1.17	-0.000892		-0.34
		Age * Total assets	0.000816		1.26	0.000546		0.86	0.00031		0.5	-0.00108	*	-1.66	0.000803		1.13
		Adjusted R-squared	0.19			0.195			0.189			0.189			0.189
		Great circle distance [km]	30			40			50			60			70
		Survival equation
		Age	2.67446	***	19.69
		Total assets	0.19468	***	9.333
		Age * Total assets	-0.10658	***	-7.733
		Notes: *** significant at 1% level, ** 5% level, * 10% level; The dependent variable for all main equations is an average annual growth rate of total assets for the period 2007 - 2015 (G_TA_2007_2015). All variables apart from survival probability are transformed by taking a natural logaritm and 1 is added to the value of variables including zeros, to avoid undefined values. All main equations ar…
		Source: Authors' analysis.
